# Supplementary material for: Molecular Identification and Acid Stress Response of an Acidithiobacillus thiooxidans Strain Isolated from Rio Tinto (Spain)
Source: MDPI journal article supplement (doi:10.3390/ijms241713391), 2023-08-29
Supplement: s1 [file s1]

Table S1. 16S rRNA sequences of the SOB isolates and BLASTn-based identification based on the percentage of identity.

| Isolate    | Sequence                                                                                                                                                                                                                                                                                                                                                                                                                                                                                                                                                                                                                                                                                                                                                                                                                                                                                                                                                                                                                                                                                                                     | Identification               | Per. Identity |
|------------|------------------------------------------------------------------------------------------------------------------------------------------------------------------------------------------------------------------------------------------------------------------------------------------------------------------------------------------------------------------------------------------------------------------------------------------------------------------------------------------------------------------------------------------------------------------------------------------------------------------------------------------------------------------------------------------------------------------------------------------------------------------------------------------------------------------------------------------------------------------------------------------------------------------------------------------------------------------------------------------------------------------------------------------------------------------------------------------------------------------------------|------------------------------|---------------|
| De.02II-12 | CGCAGCACACCCCCAAAAACCCCCGTATGGCTCAGATTGAACGCTAGCGGCATGCTTTACACATGCAAGTCGAACGGCAGCGCGGGGTAACCTGGCGGCGAGTGGCGAACGGGTGAGTAATACATCGGAACGTGCCCTGTGATGGGGGATAACTACGCGAAAGCGTAGCTAATACCGCATACGACCTACGGGTGAAAGTGGGGGATCGCAAGACCTCACGTCATAGGAGCGGCCGATGGCGGATTAGCTAGTTGGTGAGGTAAAGGCTTACCAAGGCAACGATCCGTAGCTGGTCTGAGAGGACGACCAGCCACACTGGGACTGAGACACGGCCAGACTCCTACGGGAGGCAGCAGTGGGAATCTTGGACAATGGGGGCAACCCGTATCCAGCAATGCCGCGTGTGGGATGAAGGCCTTCGGGTGTAAACCACTTTTGGCGGGGGCGAAATATCGAGTGCTAATACCATTCGGTGATGACGGTACCCGAGAATAAGCACCGGCTAACTACGTGCCAGCAGCCGCGGTAATACGTAGGGTGCAGCGTTAATCGGAATTACTGGGCGTAAAGCGTGCGCAGGCGGTTAGGTAAGACAGATGTGAAATTCCCGGGCTCAACCTGGGAACGTGATTTGTGACTGCCTGACTAGAGTGCGGCGAGAGGGAGTGGAATTCGCGGTGTAGCAGTGAAATGCGTAGATATGCGGAGGAACACCGATGGCGAAGGCAACTCCCTGGGCCCTGCACTGACGCTCATGCACGAAAGCGTGGGGAGCAAACAGGATTAGATACCCTGGTAGTCCACGCCCTAAACGATGTCGACTAGTTGTTGGACGGGTACTGTTTCAGTAACGAAGCTAACGCGTGAAGTCGACCGCCTGGGAGTAGCGCCGCAAGGTTAAAACTCAAAGGAATTGACGGGGACCCGCACAAGCGGTGGATGATGTGGTTTAATTCGATGCAACGCGAAAAACCTTACCTACCCTTGACATGCCAGGAACCTACCAGAGATGGTTTGGTGCTCGAAAGAGAGCCTGGACAAGGTGCTGCATGGCTGTCGTGAGTGTGCGTGAAGTCCCCGCAAC | <i>Thiomonas</i> sp.         | 100%          |
| De.02II-34 | GTGCGGGACTTAACCCAACATCTCACGACACGAGCTGACGACAGCCATGCAGCACCTGTGTCCAGGCTCTCTTTGAGCACCAACCATCTCTGGTAAGTTCCTGGCATGTCAAGGTTAGGTAAAGTTTTTTCGCGTTCGATCGAATTAAACCACATCATCCACCGCTTGTGCGGGTCCCCGTCAATTCCCTTGAGTTTTAACCTTGCGGCCGTACTCCCCAGGCGGTGACTTCACGCGTTAGCTTCGTTACTGAACAGTAACCCGTCCAACAACTAGTCGACATCGTTTTAGGGCGTGGACTACCAGGGTATCTAATCCTGTTTGCTCCACAGCTTTTCGTGCATGAGCGTCAGTGCAGGCCAGGGAGTTGCCTTCGCCATCGGTGTTCTCCGCATATCTACGCATTTCACTGCTACACGCGGAATTCACACTCCCTCTGCGCGACTCTAGTCAGGCAGTCACAAATGCAGTTCACAGGTTGAGCCCGGAATTTACATCTGTCTTACCTAACCGCCTGCGCACGCTTTACGCCAGTAATTCGATTAACGCTTGCAACCTACGTATTACCGCGGTGCTGGCACGTAGTTAGCCGGTGCTTATTCTGCGGGTACCGTCATACCGAATGGTATTAGCACTCGATATTTGCCCCCGCCAAAAGTGGTTTACAACCCGAAGGCCTTCATCCACACGCGGCATTGCTGGATCAGGGTTGCCCCATTTGTCCAAGATTCGCCACTGCTGCCTCCCGTAGGAGTCTGGGCCGTGCTCAGTCCCAGTGTGGCTGGTCTCTCTCAGACCAGCTACGGATCGTTGCCTTGGTAAGCCTTTACCTCACCAACTAGCTAATCCGCCATCGGCCGCTCCTATGACGTGAGGTCTTGCGATCCCCACTTTACCCGTAGGTGCTATGCGGTATTAGCTACGCTTTGCGGTAGTTATCCCCCATCACAGGGCACGTTCCGATGTATTACTCACCGTTGCGCACTCGCGCCAGGTTACCCCGCGTGCCGTTGCATGTGTAAGCATGCCGC                                                      | <i>Thiomonas</i> sp.         | 99.90%        |
| Lo.19II-1  | TGCCTAACACATGCAAGTCGAACGGTAACAGGTCTTCGGATGCTGACGAGTGGCGGACGGGTGAGTAATGCGTAGGAATCTGTCTTTGAGTGGGGGACAACCCAGGGAAA CTGGGGCTAATACCGCATAAGCCCTGAGGGGGAAAAGCGGGGGATCTTCGGACCTCGCGCTGGAAGAGGAGCCTACGTCTGATTAGCTAGTTGGTAGGGTAAAGGCCTACCAAGGCGACGATCGGTAGCTGGTCTGAGAGGACGACCAGCCACACTGGGACTGAGACACGGCCAGACTCCTACGGGAGGCAGCAGTGGGGAATTTTCGCAATGGGGGCAACCCGTGACGAAGCAATGCCGCGTGAATGAAGAAGGCCTTCGGGTTGTAAAGTTCTTTCTGTGAGGACGAAAAGGTGGGTGCTAATAACGCCCTGCTGTTGACGTGAATCCAAGAAGAAGCACCGGCTAACTCCGTGCCAGCAGCCGCGGTAATACGGGGGGTGCAAGCGTTAATCGGAATCACTGGGCGTAAAGGGTGCGTAGGCGGTGCATTAGGTCTGTCTGAAATCCCCGGGCTCAACCTGGGAATGGCGGTGGAACCGGTGACTAGAGTATGGGAGAGGGTGGTGGAATCCAGGTGTAGCGGTGAAATGCGTAGAGATCTGGAAGAACATCAGTGGCGAAGGCGGCCACCTGGCCCAATACTGACGCTGAGGCACGAAAGCGTGGGGAGCAAACAGGATTAGATACCCCTGGTAGTCCACGCCCTAAACGATGAATACTAGATGTTTGGTGCCCAAGCGTACTGAGTGTGCTAGCTAACGCGATAAGTATTCGCCCTGGGAAGTACGGCCGCAAGGTTAAACTCAAAGGAATTGACGGGGGCCGCACAAAGCGGTGGAGCATGTGGTTTAATTCGATGCAACGCGAAGAACCTTACCTGGGCTTGACATGTCTGGAATCCTGCAGAGATGCGGGAGTGCCCTTCGGGGGAATCAGAACAGGTGCTGCATGGCTGTCTGTCAGTCTGTCTC                                                            | <i>Acidithiobacillus</i> sp. | 99.81%        |

|            |                                                                                                                                                                                                                                                                                                                                                                                                                                                                                                                                                                                                                                                                                                                                                                                                                                                                                                                                                                                                                                                                                                                                                        |                       |        |
|------------|--------------------------------------------------------------------------------------------------------------------------------------------------------------------------------------------------------------------------------------------------------------------------------------------------------------------------------------------------------------------------------------------------------------------------------------------------------------------------------------------------------------------------------------------------------------------------------------------------------------------------------------------------------------------------------------------------------------------------------------------------------------------------------------------------------------------------------------------------------------------------------------------------------------------------------------------------------------------------------------------------------------------------------------------------------------------------------------------------------------------------------------------------------|-----------------------|--------|
| Lo.19II-2  | GCTCAGATTGAACGCTGGCGGCATGCCTAACACATGCAAGTCGAACGGTAACAGGTCTTCGGATGCTGACGAGTGGCGGACGGGTGAGTAATGCGTAGGAATCTGTCTTT<br>TAGTGGGGGACAACCCAGGGAACTTGGGCTAATACCGCATGAGCCCTGAGGGGGAAGCGGGGGATCTTCGGACCTCGCGCTAAGGGAGGAGCCTACGTCTGATTAGCT<br>AGTTGGTAGGGTAAAGGCCTACCAAGGCGACGATCAGTAGCTGGTCTGAGAGGACGACCAGCCACACTGGGACTGAGACACGGCCCAGACTCCTACGGGAGGCAGCAGTG<br>GGGAATTTTTCGCAATGGGGGCAACCCTGACGAAGCAATGCCGCTGGATGAAGAAGGCCTTCGGGTGTAAAGTCCTTTCTGGAGGACGAAAAGGCGGGTTCTAATAC<br>AATCTGCTGTTGACGTGAATCCAAGAAGAAGCACCGGCTAACTCCGTGCCAGCAGCCGCGGTAATACGGGGGGTGCAAGCGTTAATCGGAATCACTGGGCGTAAAGGGTG<br>CGTAGGCGGTACGTTAGGTCTGTCTGTGAAATCCCCGGGCTCAACCTGGGAATGGCGGTGGAACCGGCGGACTAGAGTATGGGAGAGGGTGGTGGAAATCCAGGTGTAGC<br>GGTGAAATGCGTAGAGATCTGGAGGAACATCAGTGGCGAAGGCGGCCACCTGGCCCAATACTGACGCTGAGGCACGAAAGCGTGGGGAGCAAAACAGGATTAGATACCCTG<br>GTAGTCCACGCCCTAAACGATGAATACTAGATGTTTGGTGCCACGCGTACTGAGTGTCTGTAGCTAACGCGATAAGTATTCCGCCTGGGAAGTACGGCCGCAAGGTTAAAA<br>CTCAAAGGAATTGACGGGGGCCCGCACAAAGCGGTGGAGCATGTGGTTTAATTTCGATGCAACGCGAAGAACCTTACCTGGGCTTGACATGTCCGGAATTCTGCAGAGATGC<br>GGGAGTGCCCTTCGGGGAATCGGAACACAGGTGCTGCATGGCTGTCTGTAGCTCGTGTCTGTGAGATGTTGGGTTAAGTCCCGCA | Acidithiobacillus sp. | 100%   |
| Lo.19II-12 | TGCCTAACACATGCAAGTCGAACGGTAACAGGTCTTCGGATGCTGACGAGTGGCGGACGGGTGAGTAATGCGTAGGAATCTGTCTTTGAGTGGGGGACAACCCAGGGAAA<br>CTTGGGCTAATACCGCATAAGCCCTGAGGGGGAAGCGGGGGATCTTCGGACCTCGCGCTGGAAGAGGAGCCTACGTCTGATTAGCTAGTTGGTAGGGTAAAGGCCTACC<br>AAGGCGACGATCGGTAGCTGGTCTGAGAGGACGACCAGCCACACTGGGACTGAGACACGGCCCCAGACTCCTACGGGAGGCAGCAGTGGGGAATTTTTCGCAATGGGGGC<br>AACCCTGACGAAGCAATGCCGCGTGAATGAAGAAGGCCTTCGGGTTGTAAAGTTCTTTCTGTGGAGGACGAAAAGGTGGGTGCTAATAACGCCTGCTGTTGACGTGAATCC<br>AAGAAGAAGCACCGGCTAACTCCGTGCCAGCAGCCGCGTAATACGGGGGGTGCAAGCGTTAATCGGAATCACTGGGCGTAAAGGGTGCGTAGGCGGTGCATTAGGTCTG<br>TCGTGAAATCCCCGGGCTCAACCTGGGAATGGCGGTGGAACCCGGTGTACTAGAGTATGGGAGAGGGTGGTGGAAATTCAGGTGTAGCGGTGAAATGCGTAGAGATCTGG<br>AGGAACATCAGTGGCGAAGGCGGCCACCTGGCCCAATACTGACGCTGAGGCACGAAAGCGTGGGGAGCAAACAGGATTAGATACCTTGGTAGTCCACGCCCTAAACGATG<br>AATACTAGATGTTTGGTGCCAAGCGTACTGAGTGTCTGTAGCTAACGCGATAAGTATTCCGCCTGGGAAGTACGGCCGCAAGGTTAAAACCTCAAAGGAATTGACGGGGGCC<br>CGCACAAAGCGGTGGAGCATGTGGTTTAATTTCGATGCAACGCGAAGAACCTTACCTGGGCTTGACATGTCTGGAATCCTGCAAGATGCGGGAGTGCCCTTCGGGGAATCA<br>GAACACAGGTGCTGTCATGGCTGTCTGTAGCTCGTGT                                              | Acidithiobacillus sp. | 99.90% |
| Lo.15III-1 | ATGCCTAACACATGCAAGTCGAACGGTAACAGGTCTTCGGATGCTGACGAGTGGCGGACGGGTGAGTAATGCGTAGGAATCTGTCTTTGAGTGGGGGACAACCCAGGGAA<br>ACTTGGGCTAATACCGCATAAGCCCTGAGGGGGAAGCGGGGGATCTTCGGACCTCGCGCTGGAAGAGGAGCCTACGTCTGATTAGCTAGTTGGTAGGGTAAAGGCCTAC<br>CAAGGCGACGATCGGTAGCTGGTCTGAGAGGACGACCAGCCACACTGGGACTGAGACACGGCCCAGACTCCTACGGGAGGCAGCAGTGGGGAATTTTTCGCAATGGGGGC<br>AACCCTGACGAAGCAATGCCGCGTGAATGAAGAAGGCCTTCGGGTTGTAAAGTTCTTTCTGTGGAGGACGAAAAGGTGGGTGCTAATAACGCCTGCTGTTGACGTGAATCC<br>AAGAAGAAGCACCGGCTAACTCCGTGCCAGCAGCCGCGTAATACGGGGGGTGCAAGCGTTAATCGGAATCACTGGGCGTAAAGGGTGCGTAGGCGGTGCATTAGGTCTG<br>TCGTGAAATCCCCGGGCTCAACCTGGGAATGGCGGTGGAACCCGGTGTACTAGAGTATGGGAGAGGGTGGTGGAAATTCAGGTGTAGCGGTGAAATGCGTAGAGATCTGG<br>AGGAACATCAGTGGCGAAGGCGGCCACCTGGCCCAATACTGACGCTGAGGCACGAAAGCGTGGGGAGCAAACAGGATTAGATACCTTGGTAGTCCACGCCCTAAACGATG<br>AATACTAGATGTTTGGTGCCAAGCGTACTGAGTGTCTGTAGCTAACGCGATAAGTATTCCGCCTGGGAAGTACGGCCGCAAGGTTAAAACCTCAAAGGAATTGACGGGGGCC<br>CGCACAAAGCGGTGGAGCATGTGGTTTAATTTCGATGCAACGCGAAGAACCTTACCTGGGCTTGACATGTCTGGAATCCTGCAAGATGCGGGAGTGCCCTTCGGGGAATCA<br>GAACACAGGTGCTGTCATGGCTGTCTGTAGCTCGTGT                                              | Acidithiobacillus sp. | 99.90% |

|             |                                                                                                                                                                                                                                                                                                                                                                                                                                                                                                                                                                                                                                                                                                                                                                                                                                                                                                                                                                                                                                                                                                                                 |                       |      |
|-------------|---------------------------------------------------------------------------------------------------------------------------------------------------------------------------------------------------------------------------------------------------------------------------------------------------------------------------------------------------------------------------------------------------------------------------------------------------------------------------------------------------------------------------------------------------------------------------------------------------------------------------------------------------------------------------------------------------------------------------------------------------------------------------------------------------------------------------------------------------------------------------------------------------------------------------------------------------------------------------------------------------------------------------------------------------------------------------------------------------------------------------------|-----------------------|------|
| Lo.15III-2  | <p>GCTAACACATGCAAGTCGAACGGTAACAGGTCTTCGGATGCTGACGAGTGGCGGACGGGTGAGTAATGCGTAGGAATCTGTCTTTGAGTGGGGGACAACCCAGGGAAACT<br/> TGGGCTAATACCGCATAAGCCCTGAGGGGGAAAGCGGGGGATCTTCGGACCTCGCGCTGGAAGAGGAGCCTACGCTCTGATTAGCTAGTTGGTAGGGTAAAGGCCTACCAA<br/> GGCGACGATCGGTAGCTGGTCTGAGAGGACGACCAGCCACACTGGGACTGAGACACGGCCCAGACTCCTACGGGAGGCAGCAGTGGGGAATTTTTCGCAATGGGGGCAAC<br/> CCTGACGAAGCAATGCCGCGTGAATGAAGAAGGCCTTCGGGTGTAAAGTTCTTTCTGTGGAGGACGAAAAGGTGGGTGCTAATATCGCCTGCTGTTGACGTGAATCCAAG<br/> AAGAAGCACCCGGCTAACTCCGTGCCAGCAGCCGCGTAATACGGGGGTGCAAGCGTTAATCGGAATCACTGGGCGTAAAGGGTGGTAGGCGGTGCATTAGGTCTGTCTG<br/> TGAAATCCCCGGGCTCAACCTGGGAATGGCGGTGGAAACCGGTGTACTAGAGTATGGGAGAGGGTGGTGAATTCAGGTGTAGCGGTGAAATGCGTAGAGATCTGGAGG<br/> AACATCAGTGGCGAAGGCGGCCACCTGGCCCAATACTGACGCTGAGGCACGAAAGCGTGGGGAGCAAACAGGATTAGATACCCCTGGTAGTCCACGCCCTAAACGATGAAT<br/> ACTAGATGTTTTGGTGCCAAGCGTACTGAGTGTCTGTAGCTAACGCGATAAGTATTCCGCTGGGAAGTACGGCCGCAAGGTTAAAACTCAAAGGAATTGACGGGGGCCCGC<br/> ACAAGCGGTGGAGCATGTGGTTTAATTCGATGCAACGCGAAGAACCCTTACCTGGGCTTGACATGTCTGGAATCCTGCAGAGATGCGGGAGTGCCCTTCGGGGAATCAGAA<br/> CACAGGTGCTGCATGGCTGTCTGCTCAGCTCG</p>    | Acidithiobacillus sp. | 100% |
| Lo.15III-14 | <p>TGCCTAACACATGCAAGTCGAACGGTAACAGGTCTTCGGATGCTGACGAGTGGCGGACGGGTGAGTAATGCGTAGGAATCTGTCTTTGAGTGGGGGACAACCCAGGGAAA<br/> CTTGGGCTAATACCGCATAAGCCCTGAGGGGGAAAGCGGGGGATCTTCGGACCTCGCGCTGGAAGAGGAGCCTACGCTCTGATTAGCTAGTTGGTAGGGTAAAGGCCTACC<br/> AAGCGACGATCGGTAGCTGGTCTGAGAGGACGACCAGCCACACTGGGACTGAGACACGGCCCAGACTCCTACGGGAGGCAGCAGTGGGGAATTTTTCGCAATGGGGGC<br/> AACCCTGACGAAGCAATGCCGCGTGAATGAAGAAGGCCTTCGGGTGTAAAGTTCTTTCTGTGGAGGACGAAAAGGTGGGTGCTAATATCGCCTGCTGTTGACGTGAATCC<br/> AAGAAGAAGCACCCGGCTAACTCCGTGCCAGCAGCCGCGTAATACGGGGGTGCAAGCGTTAATCGGAATCACTGGGCGTAAAGGGTGGTAGGCGGTGCATTAGGTCTG<br/> TCGTGAAATCCCCGGGCTCAACCTGGGAATGGCGGTGGAAACCGGTGTACTAGAGTATGGGAGAGGGTGGTGAATTCAGGTGTAGCGGTGAAATGCGTAGAGATCTGG<br/> AGGAACATCAGTGGCGAAGGCGGCCACCTGGCCCAATACTGACGCTGAGGCACGAAAGCGTGGGGAGCAAACAGGATTAGATACCCCTGGTAGTCCACGCCCTAAACGATG<br/> AATACTAGATGTTTTGGTGCCAAGCGTACTGAGTGTCTGTAGCTAACGCGATAAGTATTCCGCTGGGAAGTACGGCCGCAAGGTTAAAACTCAAAGGAATTGACGGGGGCC<br/> CGCACAAAGCGGTGGAGCATGTGGTTTAATTCGATGCAACGCGAAGAACCCTTACCTGGGCTTGACATGTCTGGAATCCTGCAGAGATGCGGGAGTGCCCTTCGGGGAATCA<br/> GAACACAGGTGCTGCATGGCTGTCTGCTCAGCTCGTT</p> | Acidithiobacillus sp. | 100% |

Table S2. List of cytoplasmic proteins picked and digested with trypsin in the *A. thiooxidans* proteome analysis under extreme acid and neutral pH conditions. Spot proteins are numbered on the figures 33 and 34. Experimental isoelectric point (pI) and molecular weight (Mw); the up- or down-regulation ratios in pH 0.7 vs 3.0, and pH 0.7 vs 6.0 conditions; the COG and KEGG numbers; and the functional classification by COG system are indicated. Those proteins up-regulated at pH 0.7 are highlighted in pink color.

| pI   | Mw (kDa) | 0,7/3,0 Av. Ratio | 0,7/6,0 Av. Ratio | Accession No.  | Description                                     | COG No. | KEGG No. | EggNOG Category | Function                       |
|------|----------|-------------------|-------------------|----------------|-------------------------------------------------|---------|----------|-----------------|--------------------------------|
| 4.42 | 15.3     | -5.14             | -8.80             | Lo19II-12_1440 | 50S ribosomal protein L7/L12                    | COG0222 | K02935   | J               | Translation                    |
| 4.43 | 40.0     | -16.01            | -16.52            | Lo19II-12_1500 | hypothetical protein                            | COG2067 | K06076   | I               | Lipid transport and metabolism |
| 4.63 | 54.5     | -38.37            | -40.79            | Lo19II-12_2871 | Enolase                                         | COG0148 | K01689   | G               | Central C metabolism           |
| 5.05 | 42.0     | -5.12             | -4.66             |                | hypothetical protein                            |         |          |                 |                                |
| 5.06 | 10.0     | -2.40             | -3.39             | Lo19II-12_3122 | Major Carboxysome Shell Protein 1C              | COG4577 | K04027   | E               | CO2 fixation                   |
| 5.06 | 41.2     | -9.53             | -11.35            | Lo19II-12_873  | Putative membrane transport protein             | COG1494 | K06076   | G               | Central C metabolism           |
| 5.13 | 43.8     | -3.39             | -2.71             | Lo19II-12_569  | hypothetical protein                            | -       | -        | R               |                                |
| 5.14 | 41.9     | -3.57             | -2.89             |                | hypothetical protein                            |         |          |                 |                                |
| 5.19 | 71.1     | -44.84            | -35.13            | Lo19II-12_8    | GroEL chaperone                                 | COG0459 | K04077   | O               | Chaperone                      |
| 5.21 | 57.6     | -35.22            | -33.67            | Lo19II-12_3130 | Ribulose biphosphate carboxylase large chain    | COG1850 | K01601   | G               | CO2 fixation                   |
| 5.22 | 22.      | -19.76            | -20.23            | Lo19II-12_469  | Putative inorganic diphosphatase                | COG0221 | K01507   | C               | Central C metabolism           |
| 5.23 | 50.73    | -4.79             | -5.68             | Lo19II-12_987  | Beta sliding clamp                              | COG0592 | K03629   | L               | DNA repair                     |
| 5.23 | 53.5     | -6.94             | -6.62             | Lo19II-12_1596 | Metalloprotease TldD                            | COG0312 | K03568   | S               |                                |
| 5.25 | 5.0      | -4.79             | -5.02             | Lo19II-12_3129 | Ribulose biphosphate carboxylase small chain    | COG4451 | K01602   | C               | CO2 fixation                   |
| 5.36 | 56.6     | -33.55            | -36.18            | Lo19II-12_240  | Glutamate synthase [NADPH] small chain          | COG0493 | K00266   | E               | N fixation                     |
| 5.36 | 46.9     | -5.77             | -4.67             | Lo19II-12_453  | S-adenosylmethionine synthase                   | COG0192 | K00789   | H               | Transport and metabolism       |
| 5.39 | 22.6     | -8.44             | -12.35            | Lo19II-12_2388 | ATP-dependent Clp protease                      | COG0740 | K01358   | O               | Chaperone                      |
| 5.41 | 42.5     | 3.04              | 3.31              | Lo19II-12_569  | hypothetical protein                            | -       | -        | R               |                                |
| 5.43 | 43.7     | 1.98              | 2.11              | Lo19II-12_3295 | hypothetical protein                            | COG2067 | -        | I               | Lipid transport and metabolism |
| 5.47 | 39.7     | -6.58             | -5.08             | Lo19II-12_455  | Adenosine kinase                                | COG0524 | K00856   | G               | Central C metabolism           |
| 5.49 | 61.4     | -26.52            | -38.25            | Lo19II-12_1033 | ATP synthase subunit alpha                      | COG0056 | K02111   | C               | Central C metabolism           |
| 5.53 | 28.5     | -2.29             | -2.25             | Lo19II-12_2153 | Putative metal-dependent hydrolase YcfH         | COG0084 | K03424   | L               | DNA repair                     |
| 5.57 | 53.6     | -24.57            | -16.46            | Lo19II-12_953  | Glycerol kinase                                 | COG0554 | K00864   | C               | Central C metabolism           |
| 5.64 | 5.0      | 2.96              | 1.26              | Lo19II-12_1161 | hypothetical protein                            | COG3439 | -        | S               |                                |
| 5.68 | 24.6     | -5.77             | -4.86             | Lo19II-12_879  | Ribulose-phosphate 3-epimerase                  | COG0036 | K01783   | G               | Central C metabolism           |
| 5.76 | 42.5     | -2.27             | -1.74             |                | hypothetical protein                            |         |          |                 |                                |
| 5.89 | 44.4     | -2.05             | -2.07             | Lo19II-12_2952 | NADP-dependent malic enzyme                     | COG0281 | -        | C               | Central C metabolism           |
| 6.00 | 21.5     | -2.01             | -2.52             | Lo19II-12_2919 | Ribosome-recycling factor                       | COG0233 | K02838   | J               | Translation                    |
| 6.06 | 53.6     | -13.55            | -12.8             | Lo19II-12_407  | SoxB                                            | COG0737 | K17224   | F               | S metabolism                   |
| 6.11 | 53.7     | -8.16             | -7.66             | Lo19II-12_2860 | Dihydrolipoyl dehydrogenase                     | COG1249 | -        | C               | Central C metabolism           |
| 6.18 | 67.2     | -2.58             | -3.07             | Lo19II-12_407  | Mannosylglucosyl-3-phosphoglycerate phosphatase | COG0737 | K17224   | F               | Central C metabolism           |
| 6.22 | 53.4     | -22.01            | -21.28            | Lo19II-12_407  | SoxB                                            | COG0737 | K17224   | F               | S metabolism                   |
| 6.28 | 22.9     | -52.40            | -48.63            | Lo19II-12_2656 | Superoxide dismutase [Fe]]                      | COG0605 | K04564   | P               | Transport and metabolism       |
| 6.42 | 39.3     | -28.15            | -26.52            | Lo19II-12_875  | Glyceraldehyde-3-phosphate dehydrogenase        | COG0057 | K00134   | G               | Central C metabolism           |
| 6.84 | 5.0      | 5.33              | 2.60              | Lo19II-12_431  | hypothetical protein                            | -       | -        | S               |                                |

|       |      |       |       |                |                                         |         |        |   |                   |
|-------|------|-------|-------|----------------|-----------------------------------------|---------|--------|---|-------------------|
| 7.20  | 5.0  | 2.87  | 2.00  | Lo19II-12_431  | hypothetical protein                    | -       | -      | S |                   |
| 7.44  | 28.4 | 13.16 | 9.65  | Lo19II-12_462  | Parvulin-type peptidyl-prolyl cis-trans | COG0760 | K03769 | O | Chaperone         |
| 9.89  | 15.4 | 3.23  | 3.21  | Lo19II-12_154  | hypothetical protein                    | cl21600 | -      | R |                   |
| 10.06 | 25.2 | 19.4  | 15.91 | Lo19II-12_1433 | Peptidoglycan-binding protein ArfA      | COG2885 | K03286 | M | Ammonia secretion |

Table S3. *Acidithiobacillus* genomes used in the study, accession identifiers and metadata of geographic location and reference sequence from NCBI. Data was recovered from NCBI database and/or collected in this study. When not reported specifically in the literature, latitude and longitude were calculated for the city, province or prefecture available. Data was recovered from genome submission reports, listed publications and/or collected in this study. All available *Acidithiobacillus* strains were classified in phylogenetic groups utilizing their 16S-5S rRNA cluster sequences and based on Moya-Beltrán et al. (2021) and L. Li et al. (2019).

| Strain                                         | Current classification | New classification                           | Geographic location                         | Latitude   | Longitude   | Ref.Seq. (NCBI) |
|------------------------------------------------|------------------------|----------------------------------------------|---------------------------------------------|------------|-------------|-----------------|
| <i>Acidithiobacillus albertensis</i> DSM 14366 | <i>A. albertensis</i>  | <i>A. thiooxidans</i> sp. <i>albertensis</i> | Canada: Alberta                             | 56.130366  | -106.346771 | GCF_001931655.1 |
| <i>Acidithiobacillus albertensis</i> No 26     | <i>A. albertensis</i>  | <i>A. thiooxidans</i> sp. <i>albertensis</i> | Norway: Roeros                              | 62.572197  | 11.376421   | GCF_018853595.1 |
| <i>Acidithiobacillus caldus</i> 6              | <i>A. caldus</i>       | <i>Fervidacidithiobacillus cladus</i>        | South Africa: Barberton                     | -25.731957 | 31.067435   | GCF_018854195.1 |
| <i>Acidithiobacillus caldus</i> ATCC 51756     | <i>A. caldus</i>       | <i>Fervidacidithiobacillus cladus</i>        | United Kingdom: England, North Warwickshire | 52.565820  | -1.683508   | GCF_000175575.2 |
| <i>Acidithiobacillus caldus</i> BC13           | <i>A. caldus</i>       | <i>Fervidacidithiobacillus cladus</i>        | United Kingdom: England, Warwick            | 52.267135  | -1.467522   | GCF_018853575.1 |
| <i>Acidithiobacillus caldus</i> C-SH12         | <i>A. caldus</i>       | <i>Fervidacidithiobacillus cladus</i>        | Australia: Brisbane                         | -27.451349 | 153.023374  | GCF_018854145.1 |
| <i>Acidithiobacillus caldus</i> CV18-1         | <i>A. caldus</i>       | <i>Fervidacidithiobacillus cladus</i>        | Argentina: Neuquen                          | -37.499821 | -70.559946  | GCF_018853985.1 |
| <i>Acidithiobacillus caldus</i> DSM 8584       | <i>A. caldus</i>       | <i>Fervidacidithiobacillus cladus</i>        | United Kingdom: England, North Warwickshire | 52.565820  | -1.683508   | GCF_018853615.1 |
| <i>Acidithiobacillus caldus</i> DX             | <i>A. caldus</i>       | <i>Fervidacidithiobacillus cladus</i>        | China: Jiangxi                              | 27.291818  | 115.282396  | GCF_001756675.1 |
| <i>Acidithiobacillus caldus</i> F              | <i>A. caldus</i>       | <i>Fervidacidithiobacillus cladus</i>        | South Africa: Vosburg                       | -30.593549 | 22.852902   | GCF_018853755.1 |
| <i>Acidithiobacillus caldus</i> KU             | <i>A. caldus</i>       | <i>Fervidacidithiobacillus cladus</i>        | United Kingdom: England, North Warwickshire | 52.565820  | -1.683508   | GCF_018853545.1 |
| <i>Acidithiobacillus caldus</i> MELC5          | <i>A. caldus</i>       | <i>Fervidacidithiobacillus cladus</i>        | Chile: Antofagasta                          | -23.650999 | -70.398208  | GCF_018853765.1 |
| <i>Acidithiobacillus caldus</i> MNG            | <i>A. caldus</i>       | <i>Fervidacidithiobacillus cladus</i>        | South Africa: Western Cape                  | -33.769046 | 18.384170   | GCF_018854235.1 |
| <i>Acidithiobacillus caldus</i> MTH-04         | <i>A. caldus</i>       | <i>Fervidacidithiobacillus cladus</i>        | China: Tenchong area, Yunnan province       | 24.923108  | 98.537724   | GCF_001650235.3 |
| <i>Acidithiobacillus caldus</i> SM-1           | <i>A. caldus</i>       | <i>Fervidacidithiobacillus cladus</i>        | China: Shenzhen                             | 35.861660  | 104.195397  | GCF_000221025.1 |
| <i>Acidithiobacillus caldus</i> VAN18-3        | <i>A. caldus</i>       | <i>Fervidacidithiobacillus cladus</i>        | Argentina: Copahue                          | -37.817827 | -71.097782  | GCF_018853695.1 |

|                                                 |                       |                                       |                                        |            |             |                 |
|-------------------------------------------------|-----------------------|---------------------------------------|----------------------------------------|------------|-------------|-----------------|
| <i>Acidithiobacillus caldus</i> ZBY             | <i>A. caldus</i>      | <i>Fervidacidithiobacillus cladus</i> | Zambia: Chambishi                      | -12.648502 | 28.048678   | GCF_001756725.1 |
| <i>Acidithiobacillus caldus</i> ZJ              | <i>A. caldus</i>      | <i>Fervidacidithiobacillus cladus</i> | China: Fujian                          | 25.719660  | 118.035825  | GCF_001756745.1 |
| <i>Acidithiobacillus ferrianus</i> MG           | <i>A. ferrianus</i>   | <i>A. ferrianus</i>                   | Greece: Island of Milos                | 36.698298  | 24.395061   | GCF_010378095.1 |
| <i>Acidithiobacillus ferridurans</i> ATCC 33020 | <i>A. ferridurans</i> | <i>A. ferridurans</i>                 | Japan: Okayama prefecture, Ningyo-toge | 35.314454  | 133.930699  | GCF_018854555.1 |
| <i>Acidithiobacillus ferridurans</i> B5         | <i>A. ferridurans</i> | <i>A. ferridurans</i>                 | France: Carnoules                      | 43.286006  | 6.226177    | GCA_018854545.1 |
| <i>Acidithiobacillus ferridurans</i> DSM 583    | <i>A. ferridurans</i> | <i>A. ferridurans</i>                 | USA: Pennsylvania                      | 40.786407  | -79.781590  | GCF_018854535.1 |
| <i>Acidithiobacillus ferridurans</i> DSM 9465   | <i>A. ferridurans</i> | <i>A. ferridurans</i>                 | Australia: Ghan                        | -25.172106 | 133.181165  | GCF_018854615.1 |
| <i>Acidithiobacillus ferridurans</i> JCM 18981  | <i>A. ferridurans</i> | <i>A. ferridurans</i>                 | Japan: Okayama                         | 35.316584  | 133.936757  | GCF_003966655.1 |
| <i>Acidithiobacillus ferridurans</i> MEL3       | <i>A. ferridurans</i> | <i>A. ferridurans</i>                 | Czech Republic: Zlate Hory             | 50.250072  | 17.390357   | GCF_018854635.1 |
| <i>Acidithiobacillus ferridurans</i> Riv11      | <i>A. ferridurans</i> | <i>A. ferridurans</i>                 | Montserrat: Soufriere Hills            | 16.711178  | -62.177296  | GCF_018854695.1 |
| <i>Acidithiobacillus ferriphilus</i> A4         | <i>A. ferriphilus</i> | <i>A. ferriphilus</i>                 | Chile: Andacollo                       | -30.235697 | -71.083176  | GCF_018854785.1 |
| <i>Acidithiobacillus ferriphilus</i> C52        | <i>A. ferriphilus</i> | <i>A. ferriphilus</i>                 | Chile: Combarbala                      | -31.178952 | -71.003924  | GCF_018854755.1 |
| <i>Acidithiobacillus ferriphilus</i> DSM 100412 | <i>A. ferriphilus</i> | <i>A. ferriphilus</i>                 | Montserrat: Galway's Soufriere         | 16.683991  | -62.166924  | GCF_018854775.1 |
| <i>Acidithiobacillus ferriphilus</i> GT2        | <i>A. ferriphilus</i> | <i>A. ferriphilus</i>                 | USA: Colorado                          | 39.550265  | -105.782111 | GCF_020844025.1 |
| <i>Acidithiobacillus ferriphilus</i> Malay      | <i>A. ferriphilus</i> | <i>A. ferriphilus</i>                 | Malaysia: Pahang                       | 3.837907   | 103.299028  | GCF_018853855.1 |
| <i>Acidithiobacillus ferriphilus</i> R1         | <i>A. ferriphilus</i> | <i>A. ferriphilus</i>                 | Romania: Ilba                          | 47.716301  | 23.350883   | GCF_018854825.1 |
| <i>Acidithiobacillus ferriphilus</i> Riv13      | <i>A. ferriphilus</i> | <i>A. ferriphilus</i>                 | Montserrat: White River                | 16.742498  | -62.187366  | GCF_018854815.1 |
| <i>Acidithiobacillus ferriphilus</i> SCUT-1     | <i>A. ferriphilus</i> | <i>A. ferriphilus</i>                 | China: Dabaoshan, Shaoguan             | 24.813956  | 113.601370  | GCF_019400025.1 |
| <i>Acidithiobacillus ferriphilus</i> ST2        | <i>A. ferriphilus</i> | <i>A. ferriphilus</i>                 | Spain: Rio Tinto                       | 37.385491  | -6.661808   | GCF_018854875.1 |
| <i>Acidithiobacillus ferrivorans</i> ACH        | <i>A. ferrivorans</i> | <i>A. ferrivorans</i>                 | Chile: Tarapaca                        | -20.551766 | -69.665004  | GCF_018854855.1 |
| <i>Acidithiobacillus ferrivorans</i> CF27       | <i>A. ferrivorans</i> | <i>A. ferrivorans</i>                 | USA: Idaho                             | 44.068202  | -114.742041 | GCF_000750615.1 |
| <i>Acidithiobacillus ferrivorans</i> DSM 22755  | <i>A. ferrivorans</i> | <i>A. ferrivorans</i>                 | Norway: Kongsberg                      | 59.672480  | 9.650242    | GCF_018853935.1 |
| <i>Acidithiobacillus ferrivorans</i> PQ33       | <i>A. ferrivorans</i> | <i>A. ferrivorans</i>                 | Peru: Pasco                            | -10.396075 | -75.448301  | GCF_001857665.2 |
| <i>Acidithiobacillus ferrivorans</i> PRJEB5721  | <i>A. ferrivorans</i> | <i>A. ferrivorans</i>                 | USA: Idaho                             | 44.068202  | -114.742041 | GCF_900174455.1 |

|                                                     |                        |                                                 |                                            |            |             |                 |
|-----------------------------------------------------|------------------------|-------------------------------------------------|--------------------------------------------|------------|-------------|-----------------|
| <i>Acidithiobacillus ferrivorans</i> SS3            | <i>A. ferrivorans</i>  | <i>A. ferrivorans</i>                           | Russia: Norilsk                            | 69.355790  | 88.189294   | GCF_000214095.2 |
| <i>Acidithiobacillus ferrivorans</i><br>XJFY6S-08   | <i>A. ferrivorans</i>  | <i>A. ferrivorans</i>                           | China:xinjiang                             | 40.408679  | 85.624802   | GCF_016250455.1 |
| <i>Acidithiobacillus ferrivorans</i> YL15           | <i>A. ferrivorans</i>  | <i>A. ferrivorans</i>                           | China: Tibet                               | 31.800201  | 98.029925   | GCF_001685225.1 |
| <i>Acidithiobacillus ferrooxidans</i><br>ATCC 23270 | <i>A. ferrooxidans</i> | <i>A. ferrooxidans</i>                          | USA: Pennsylvania                          | 41.203322  | -77.194525  | GCF_000021485.1 |
| <i>Acidithiobacillus ferrooxidans</i><br>ATCC 53993 | <i>A. ferrooxidans</i> | <i>A. ferrooxidans</i>                          | Armenia: Alaverdi                          | 41.102406  | 44.661526   | GCF_000020825.1 |
| <i>Acidithiobacillus ferrooxidans</i> BN            | <i>A. ferrooxidans</i> | <i>A. ferrooxidans</i>                          | Zambia: Chambishi                          | -12.648334 | 28.047991   | GCF_024606725.1 |
| <i>Acidithiobacillus ferrooxidans</i><br>BY0502     | <i>A. ferrooxidans</i> | <i>A. ferriphilus</i>                           | China: Gansu                               | 37.505128  | 103.104235  | GCF_001652185.1 |
| <i>Acidithiobacillus ferrooxidans</i> BY-<br>3      | <i>A. ferrooxidans</i> | <i>A. ferrooxidans</i>                          | China: Baiyin, Gansu                       | 37.505128  | 103.104235  | GCF_010577825.1 |
| <i>Acidithiobacillus ferrooxidans</i><br>BYM        | <i>A. ferrooxidans</i> | <i>A. ferrooxidans</i>                          | China: Baiyin                              | 36.550227  | 104.141456  | GCF_019856615.1 |
| <i>Acidithiobacillus ferrooxidans</i><br>CCM 4253   | <i>A. ferrooxidans</i> | <i>A. ferrooxidans</i>                          | Czech Republic: Zlate Hory                 | 50.264120  | 17.394476   | GCF_003233765.1 |
| <i>Acidithiobacillus ferrooxidans</i> CF3           | <i>A. ferrooxidans</i> | <i>Acidithiobacillus</i><br><i>ferruginosus</i> | USA: Idaho                                 | 44.001058  | -114.279772 | GCF_018854495.1 |
| <i>Acidithiobacillus ferrooxidans</i><br>COP1       | <i>A. ferrooxidans</i> | <i>A. ferrooxidans</i>                          | Wales                                      |            |             | GCA_018854355.1 |
| <i>Acidithiobacillus ferrooxidans</i><br>DLC-5      | <i>A. ferrooxidans</i> | <i>A. ferrooxidans</i>                          | China: Heihe, Heilongjiang,<br>Wudalianchi | 48.748770  | 126.590359  | GCA_000732185.1 |
| <i>Acidithiobacillus ferrooxidans</i><br>DSM 16786  | <i>A. ferrooxidans</i> | <i>A. ferrooxidans</i>                          | Chile                                      |            |             | GCF_018853455.1 |
| <i>Acidithiobacillus ferrooxidans</i> DX            | <i>A. ferrooxidans</i> | <i>A. ferrooxidans</i>                          | China: Jiangxi                             | 27.291818  | 115.282396  | GCF_024606705.1 |
| <i>Acidithiobacillus ferrooxidans</i><br>GD-0       | <i>A. ferrooxidans</i> | <i>A. ferrooxidans</i>                          | China: Guangdong                           | 24.815202  | 113.595877  | GCF_024592575.1 |
| <i>Acidithiobacillus ferrooxidans</i><br>GD-B       | <i>A. ferrooxidans</i> | <i>A. ferrooxidans</i>                          | China: Guangdong                           | 24.815202  | 113.595877  | GCF_024606715.1 |
| <i>Acidithiobacillus ferrooxidans</i><br>F221       | <i>A. ferrooxidans</i> | <i>A. ferrooxidans</i>                          | Austria: Forstenau                         | 47.379095  | 13.551586   | GCF_018854265.1 |
| <i>Acidithiobacillus ferrooxidans</i><br>Hel18      | <i>A. ferrooxidans</i> | <i>A. ferrooxidans</i>                          | Germany: Helbra                            | 51.554954  | 11.487649   | GCF_001559335.1 |
| <i>Acidithiobacillus ferrooxidans</i><br>NFP31      | <i>A. ferrooxidans</i> | <i>A. ferrooxidans</i>                          | Japan: Tokyo, Miyake-jima                  | 34.050178  | 139.310054  | GCF_020887015.1 |
| <i>Acidithiobacillus ferrooxidans</i><br>PQ505      | <i>A. ferrooxidans</i> | <i>A. ferrooxidans</i>                          | Peru: Chaupimarca, Pasco                   | -10.396075 | -75.448301  | GCF_018854395.1 |

|                                                   |                              |                                                    |                                                |            |            |                 |
|---------------------------------------------------|------------------------------|----------------------------------------------------|------------------------------------------------|------------|------------|-----------------|
| <i>Acidithiobacillus ferrooxidans</i><br>PQ506    | <i>A. ferrooxidans</i>       | <i>A. ferrooxidans</i>                             | Peru: Chaupimarca, Pasco                       | -10.396075 | -75.448301 | GCF_018854475.1 |
| <i>Acidithiobacillus ferrooxidans</i><br>RVS1     | <i>A. ferrooxidans</i>       | <i>A. ferrooxidans</i>                             | Argentina: Neuquen                             | -37.499821 | -70.559946 | GCA_003931975.1 |
| <i>Acidithiobacillus ferrooxidans</i><br>TFBk     | <i>A. ferrooxidans</i>       | <i>A. ferrooxidans</i>                             | Kazakhstan: Bakyrchik deposit                  | 49.715132  | 81.588372  | GCF_024626545.1 |
| <i>Acidithiobacillus ferrooxidans</i><br>YNTRS-40 | <i>A. ferrooxidans</i>       | <i>A. ferrooxidans</i>                             | China: Yunnan                                  | 25.010194  | 98.509979  | GCF_013462805.1 |
| <i>Acidithiobacillus ferrooxidans</i><br>YQ_N3    | <i>A. ferrooxidans</i>       | <i>A. ferrooxidans</i>                             | China: Shandi River Basin, Yangquan<br>city    | 37.861102  | 113.581121 | GCF_020221655.1 |
| <i>Acidithiobacillus ferrooxidans</i><br>YQH-1    | <i>A. ferrooxidans</i>       | <i>A. ferriphilus</i>                              | China: Heilongjiang                            | 46.589310  | 125.103784 | GCF_001418795.1 |
| <i>Acidithiobacillus</i> sp. AMD<br>consortium    | <i>Acidithiobacillus</i> sp. | <i>A. ferridurans</i>                              | Canada: Sudbury                                | 46.495470  | -81.055800 | GCF_008926505.1 |
| <i>Acidithiobacillus</i> sp. ATCC 19703           | <i>Acidithiobacillus</i> sp. | <i>A. thiooxidans</i>                              | Australia: Melbourne                           | -37.711044 | 144.972942 | GCF_018853445.1 |
| <i>Acidithiobacillus</i> sp. BN09_2               | <i>Acidithiobacillus</i> sp. | <i>Igneacidithiobacillus</i><br><i>copahuensis</i> | Argentina: Neuquen                             | -37.499821 | -70.559946 | GCF_018854135.1 |
| <i>Acidithiobacillus</i> sp. CV18-1               | <i>Acidithiobacillus</i> sp. | <i>Igneacidithiobacillus</i><br><i>copahuensis</i> | Argentina: Neuquen                             | -37.499821 | -70.559946 | GCF_018854115.1 |
| <i>Acidithiobacillus</i> sp. CV18-2               | <i>Acidithiobacillus</i> sp. | <i>Igneacidithiobacillus</i><br><i>copahuensis</i> | Argentina: Neuquen                             | -37.499821 | -70.559946 | GCF_018854095.1 |
| <i>Acidithiobacillus</i> sp. CV18-4               | <i>Acidithiobacillus</i> sp. | <i>Igneacidithiobacillus</i><br><i>copahuensis</i> | Argentina: Neuquen                             | -37.499821 | -70.559946 | GCF_018854095.1 |
| <i>Acidithiobacillus</i> sp. GG1_14               | <i>Acidithiobacillus</i> sp. | <i>A. thiooxidans</i>                              | Montserrat: Saint Anthony                      | 16.742498  | -62.187366 | GCF_018853465.1 |
| <i>Acidithiobacillus</i> sp. GGI-221              | <i>Acidithiobacillus</i> sp. |                                                    | India                                          | 22.790786  | 79.703066  | GCF_000179815.1 |
| <i>Acidithiobacillus</i> sp. HP_11                | <i>Acidithiobacillus</i> sp. | <i>A. thiooxidans</i>                              | USA: New York                                  | 43.125547  | -78.370052 | GCF_015100075.1 |
| <i>Acidithiobacillus</i> sp. HP_2                 | <i>Acidithiobacillus</i> sp. | <i>A. thiooxidans</i>                              | USA: New York                                  | 43.125547  | -78.370052 | GCF_015100155.1 |
| <i>Acidithiobacillus</i> sp. HP_6                 | <i>Acidithiobacillus</i> sp. | <i>A. thiooxidans</i>                              | USA: New York                                  | 43.125547  | -78.370052 | GCF_015100135.1 |
| <i>Acidithiobacillus</i> sp. MC6.1                | <i>Acidithiobacillus</i> sp. | <i>A. ferrivorans</i>                              | Antarctica: Marian Cove, King George<br>Island | -62.214339 | -58.746154 | GCF_017165985.1 |
| <i>Acidithiobacillus</i> sp. PG05                 | <i>Acidithiobacillus</i> sp. | <i>A. ferrooxidans</i>                             | Chile: Puerto Guadal, Aysen Region             | -46.870139 | -72.670224 | GCF_017165965.1 |
| <i>Acidithiobacillus</i> sp. RW2                  | <i>Acidithiobacillus</i> sp. | <i>A. thiooxidans</i>                              | United Kingdom: Wales-Trefriw                  | 53.151257  | -3.825580  | GCF_018853815.1 |
| <i>Acidithiobacillus</i> S30A2                    | <i>Acidithiobacillus</i> sp. |                                                    |                                                |            |            | GCF_023277115.1 |
| <i>Acidithiobacillus</i> sp. SH                   | <i>Acidithiobacillus</i> sp. | <i>A. thiooxidans</i>                              | Japan: Okayama, Seto-Inland Sea                | 34.290204  | 133.439979 | GCF_002847505.1 |
| <i>Acidithiobacillus</i> sp. VAN18_1              | <i>Acidithiobacillus</i> sp. | <i>Igneacidithiobacillus</i><br><i>copahuensis</i> | Argentina: Neuquen                             | -37.499821 | -70.559946 | GCF_018854015.1 |

|                                                 |                              |                                          |                                        |            |            |                 |
|-------------------------------------------------|------------------------------|------------------------------------------|----------------------------------------|------------|------------|-----------------|
| <i>Acidithiobacillus</i> sp. VAN18_2            | <i>Acidithiobacillus</i> sp. | <i>Igneacidithiobacillus copahuensis</i> | Argentina: Neuquen                     | -37.499821 | -70.559946 | GCF_018854025.1 |
| <i>Acidithiobacillus sulfuriphilus</i> CJ-2     | <i>A. sulfuriphilus</i>      |                                          | Wales                                  | 53.055371  | -3.858145  | GCF_003721225.1 |
| <i>Acidithiobacillus thiooxidans</i> A01        | <i>A. thiooxidans</i>        | <i>A. thiooxidans</i>                    | China: Jiangxi, Pingxiang              | 28.946464  | 117.578713 | GCF_000559045.1 |
| <i>Acidithiobacillus thiooxidans</i> A02        | <i>A. thiooxidans</i>        | <i>A. thiooxidans</i>                    | China: Jiangxi, Pingxiang              | 28.946464  | 117.578713 | GCF_001705645.1 |
| <i>Acidithiobacillus thiooxidans</i> ATCC 15494 | <i>A. thiooxidans</i>        | <i>A. thiooxidans</i>                    | USA                                    |            |            | GCF_018854725.1 |
| <i>Acidithiobacillus thiooxidans</i> ATCC 19377 | <i>A. thiooxidans</i>        | <i>A. thiooxidans</i>                    | England: Dorset                        | 50.612788  | -2.135306  | GCF_009662475.1 |
| <i>Acidithiobacillus thiooxidans</i> ATCC 21835 | <i>A. thiooxidans</i>        | <i>A. thiooxidans</i>                    | Japan: Gunma                           | 36.390668  | 139.060406 | GCF_018853915.1 |
| <i>Acidithiobacillus thiooxidans</i> ATCC 8085  | <i>A. thiooxidans</i>        | <i>A. thiooxidans</i>                    | USA: New Jersey                        | 40.056541  | -74.308630 | GCF_018854645.1 |
| <i>Acidithiobacillus thiooxidans</i> BC51       | <i>A. thiooxidans</i>        | <i>A. thiooxidans</i>                    | United Kingdom: Warwickshire           | 52.269599  | -1.547936  | GCF_018853795.1 |
| <i>Acidithiobacillus thiooxidans</i> BN09-1     | <i>A. thiooxidans</i>        | <i>A. thiooxidans</i>                    | Argentina: Neuquen                     | -37.499821 | -70.559946 | GCF_018854655.1 |
| <i>Acidithiobacillus thiooxidans</i> BY-02      | <i>A. thiooxidans</i>        | <i>A. thiooxidans</i>                    | China: Gansu, Baiyin                   | 36.545814  | 104.136650 | GCF_001705725.1 |
| <i>Acidithiobacillus thiooxidans</i> CLST       | <i>A. thiooxidans</i>        | <i>A. thiooxidans</i>                    | Chile: Salar de Gorgea, Atacama Region | -25.390183 | -68.696151 | GCF_002079865.1 |
| <i>Acidithiobacillus thiooxidans</i> DMC        | <i>A. thiooxidans</i>        | <i>A. thiooxidans</i>                    | China: Hunan, Chenzhou                 | 25.738462  | 113.028365 | GCF_001705625.1 |
| <i>Acidithiobacillus thiooxidans</i> DXS-W      | <i>A. thiooxidans</i>        | <i>A. thiooxidans</i>                    | China: Xinjiang                        | 42.927298  | 93.673535  | GCF_001705805.1 |
| <i>Acidithiobacillus thiooxidans</i> GD1-3      | <i>A. thiooxidans</i>        | <i>A. thiooxidans</i>                    | China: Guangdong, Shaoguan             | 24.815202  | 113.595877 | GCF_001705695.1 |
| <i>Acidithiobacillus thiooxidans</i> JYC-17     | <i>A. thiooxidans</i>        | <i>A. thiooxidans</i>                    | China: Gansu, Baiyin                   | 36.545814  | 104.136650 | GCF_001705755.1 |
| <i>Acidithiobacillus thiooxidans</i> VAN18-5    | <i>A. thiooxidans</i>        | <i>A. thiooxidans</i>                    | Argentina: Neuquen                     | -37.499821 | -70.559946 | GCF_018854715.1 |
| <i>Acidithiobacillus thiooxidans</i> ZBY        | <i>A. thiooxidans</i>        | <i>A. thiooxidans</i>                    | Zambia: Chambishi                      | -12.648334 | 28.047991  | GCF_001756595.1 |
| <i>Acidithiobacillus thiooxidans</i> Lo.19II-12 | <i>A. thiooxidans</i>        | <i>A. thiooxidans</i>                    | Spain: Rio Tinto                       | 37.690293  | -6.561146  |                 |
